# Supplementary material
Source: PubMed Central journal article supplement (PMC4790826)
Supplement: bloj009247.ww1_default.pdf [file bloj009247.ww1_default.pdf]

**Appendix table: Additional Predictors of *Estimated* Calorie Content Among Participants Purchasing Meals at Chain Fast-Food Restaurants in 4 New England Cities, 2010 and 2011<sup>a</sup>**

|                                                |            | Adults          |                         | Adolescents     |                         | School-age Children |                         |
|------------------------------------------------|------------|-----------------|-------------------------|-----------------|-------------------------|---------------------|-------------------------|
| Variables                                      |            | Relative Change | 95% Confidence Interval | Relative Change | 95% Confidence Interval | Relative Change     | 95% Confidence Interval |
| <b>Taste Important in Food Choice</b>          | Not at All | 1.0 (ref)       |                         | 1.0 (ref)       |                         | 1.0 (ref)           |                         |
|                                                | A Little   | 0.98            | 0.73, 1.32              | 1.02            | 0.73, 1.44              | 2.36                | 0.45, 12.4              |
|                                                | A Lot      | 1.21            | 0.92, 1.59              | 1.28            | 0.93, 1.78              | 1.60                | 0.32, 7.90              |
| <b>Calories Important in Food Choice</b>       | Not at All | 1.0 (ref)       |                         | 1.0 (ref)       |                         | 1.0 (ref)           |                         |
|                                                | A Little   | 0.98            | 0.85, 1.12              | 1.01            | 0.85, 1.19              | 1.21                | 0.78, 1.87              |
|                                                | A Lot      | 0.98            | 0.85, 1.13              | 0.98            | 0.81, 1.19              | 0.73                | 0.48, 1.10              |
| <b>Price Important in Food Choice</b>          | Not at All | 1.0 (ref)       |                         | 1.0 (ref)       |                         | 1.0 (ref)           |                         |
|                                                | A Little   | 0.97            | 0.85, 1.12              | 0.91            | 0.77, 1.07              | 0.75                | 0.49, 1.15              |
|                                                | A Lot      | 1.05            | 0.91, 1.21              | 1.13            | 0.92, 1.37              | 0.91                | 0.58, 1.43              |
| <b>“Quick to Eat” Important in Food Choice</b> | Not at All | 1.0 (ref)       |                         | 1.0 (ref)       |                         | 1.0 (ref)           |                         |
|                                                | A Little   | 0.83            | 0.70, 0.97              | 1.01            | 0.85, 1.20              | 0.84                | 0.53, 1.32              |
|                                                | A Lot      | 0.89            | 0.77, 1.03              | 0.99            | 0.83, 1.19              | 0.82                | 0.54, 1.24              |

<sup>a</sup> This table is an extension of Table 4. These additional predictors were included in the fully-adjusted model examining associations with estimated calorie content, controlling for all other variables listed in Table 4.
